# Supplementary material for: Synthetic hydrogel nanoparticles for sepsis therapy
Source: PubMed Central journal article supplement (PMC8455629; doi:10.1038/s41467-021-25847-2), 2021-09-21
Supplement: 41467_2021_25847_MOESM2_ESM.pdf [file 41467_2021_25847_MOESM2_ESM.pdf]

## Reporting Summary

Nature Research wishes to improve the reproducibility of the work that we publish. This form provides structure for consistency and transparency in reporting. For further information on Nature Research policies, see our [Editorial Policies](#) and the [Editorial Policy Checklist](#).

### Statistics

For all statistical analyses, confirm that the following items are present in the figure legend, table legend, main text, or Methods section.

n/a Confirmed

- |                                     |                                     |                                                                                                                                                                                                                                                            |
|-------------------------------------|-------------------------------------|------------------------------------------------------------------------------------------------------------------------------------------------------------------------------------------------------------------------------------------------------------|
| <input type="checkbox"/>            | <input checked="" type="checkbox"/> | The exact sample size ( $n$ ) for each experimental group/condition, given as a discrete number and unit of measurement                                                                                                                                    |
| <input type="checkbox"/>            | <input checked="" type="checkbox"/> | A statement on whether measurements were taken from distinct samples or whether the same sample was measured repeatedly                                                                                                                                    |
| <input type="checkbox"/>            | <input checked="" type="checkbox"/> | The statistical test(s) used AND whether they are one- or two-sided<br><i>Only common tests should be described solely by name; describe more complex techniques in the Methods section.</i>                                                               |
| <input type="checkbox"/>            | <input checked="" type="checkbox"/> | A description of all covariates tested                                                                                                                                                                                                                     |
| <input checked="" type="checkbox"/> | <input type="checkbox"/>            | A description of any assumptions or corrections, such as tests of normality and adjustment for multiple comparisons                                                                                                                                        |
| <input type="checkbox"/>            | <input checked="" type="checkbox"/> | A full description of the statistical parameters including central tendency (e.g. means) or other basic estimates (e.g. regression coefficient) AND variation (e.g. standard deviation) or associated estimates of uncertainty (e.g. confidence intervals) |
| <input checked="" type="checkbox"/> | <input type="checkbox"/>            | For null hypothesis testing, the test statistic (e.g. $F$ , $t$ , $r$ ) with confidence intervals, effect sizes, degrees of freedom and $P$ value noted<br><i>Give <math>P</math> values as exact values whenever suitable.</i>                            |
| <input checked="" type="checkbox"/> | <input type="checkbox"/>            | For Bayesian analysis, information on the choice of priors and Markov chain Monte Carlo settings                                                                                                                                                           |
| <input checked="" type="checkbox"/> | <input type="checkbox"/>            | For hierarchical and complex designs, identification of the appropriate level for tests and full reporting of outcomes                                                                                                                                     |
| <input checked="" type="checkbox"/> | <input type="checkbox"/>            | Estimates of effect sizes (e.g. Cohen's $d$ , Pearson's $r$ ), indicating how they were calculated                                                                                                                                                         |

*Our web collection on [statistics for biologists](#) contains articles on many of the points above.*

### Software and code

Policy information about [availability of computer code](#)

Data collection

Dynamic-light-scattering data was collected by using Malvern Zetasizer Nano software version 2.2. Absorbance was measured with an Infinite® M200 (Tecan Group, Männedorf, Switzerland). ex vivo imaging of blood and each organ was performed with an in vivo imaging system (Xenogen IVIS Lumina System) coupled to the Living Image software for data acquisition (Living Image 3.2, Xenogen Corp., Alameda, CA, USA).

Data analysis

Kaleidagraph (Version 4.5.3) and Prism 9 (Version 9.2.0) was used for the data analysis.

For manuscripts utilizing custom algorithms or software that are central to the research but not yet described in published literature, software must be made available to editors and reviewers. We strongly encourage code deposition in a community repository (e.g. GitHub). See the Nature Research [guidelines for submitting code & software](#) for further information.

### Data

Policy information about [availability of data](#)

All manuscripts must include a [data availability statement](#). This statement should provide the following information, where applicable:

- Accession codes, unique identifiers, or web links for publicly available datasets
- A list of figures that have associated raw data
- A description of any restrictions on data availability

No datasets were generated or analyzed during the current study.

## Field-specific reporting

Please select the one below that is the best fit for your research. If you are not sure, read the appropriate sections before making your selection.

Life sciences  Behavioural & social sciences  Ecological, evolutionary & environmental sciences

For a reference copy of the document with all sections, see [nature.com/documents/nr-reporting-summary-flat.pdf](https://www.nature.com/documents/nr-reporting-summary-flat.pdf)

## Life sciences study design

All studies must disclose on these points even when the disclosure is negative.

|                 |                                                                                                                                                                                                                                                                                              |
|-----------------|----------------------------------------------------------------------------------------------------------------------------------------------------------------------------------------------------------------------------------------------------------------------------------------------|
| Sample size     | In mice, sample size of n=5 or 6 for the in vivo neutralization and biodistribution studies was determined. In all experiments, the sample sizes were determined by estimating the minimum number of samples to obtain a statistically significant difference.                               |
| Data exclusions | No data were excluded from analysis.                                                                                                                                                                                                                                                         |
| Replication     | in vivo neutralization and biodistribution studies were performed once with 6 or more animals in each group. For all experiments, 2 independent experiments were performed. In addition, all attempts for replication were successful.                                                       |
| Randomization   | Animals were randomly assigned to the treatment conditions by the animal technician before the experiment started. For in vitro experiments, all experiments allocated random by who was not involved in the experiment thereafter                                                           |
| Blinding        | For animal experiments, data collection and analysis were performed blinded.<br>For in vitro experiments, all analyses of cytotoxicity, cellular uptake, and localization of HNP and histones were done fully blinded. Labeling of sections was done by numbering at the time of sectioning. |

## Reporting for specific materials, systems and methods

We require information from authors about some types of materials, experimental systems and methods used in many studies. Here, indicate whether each material, system or method listed is relevant to your study. If you are not sure if a list item applies to your research, read the appropriate section before selecting a response.

### Materials & experimental systems

| n/a                                 | Involved in the study                                           |
|-------------------------------------|-----------------------------------------------------------------|
| <input type="checkbox"/>            | <input checked="" type="checkbox"/> Antibodies                  |
| <input type="checkbox"/>            | <input checked="" type="checkbox"/> Eukaryotic cell lines       |
| <input checked="" type="checkbox"/> | <input type="checkbox"/> Palaeontology and archaeology          |
| <input type="checkbox"/>            | <input checked="" type="checkbox"/> Animals and other organisms |
| <input checked="" type="checkbox"/> | <input type="checkbox"/> Human research participants            |
| <input checked="" type="checkbox"/> | <input type="checkbox"/> Clinical data                          |
| <input checked="" type="checkbox"/> | <input type="checkbox"/> Dual use research of concern           |

### Methods

| n/a                                 | Involved in the study                           |
|-------------------------------------|-------------------------------------------------|
| <input checked="" type="checkbox"/> | <input type="checkbox"/> ChIP-seq               |
| <input checked="" type="checkbox"/> | <input type="checkbox"/> Flow cytometry         |
| <input checked="" type="checkbox"/> | <input type="checkbox"/> MRI-based neuroimaging |

## Antibodies

|                 |                                                                                                                                                                        |
|-----------------|------------------------------------------------------------------------------------------------------------------------------------------------------------------------|
| Antibodies used | mouse integrin alpha 2b/CD41 alexa fluor® 594-conjugated antibody (FAB41181T-100UG) was purchased from R&D systems (USA, Minneapolis, MN) and 25 times dilute for use. |
| Validation      | mouse integrin alpha 2b/CD41 alexa fluor® 594-conjugated antibody; mouse species reactivity; Flow Cytometry applicable.                                                |

## Eukaryotic cell lines

Policy information about [cell lines](#)

|                                                                   |                                                                                       |
|-------------------------------------------------------------------|---------------------------------------------------------------------------------------|
| Cell line source(s)                                               | 2H-11 murine endothelial cells was purchased from ATCC (Virginia, USA)                |
| Authentication                                                    | 2H-11 cell was authenticated by STR-PCR.                                              |
| Mycoplasma contamination                                          | 2H-11 was confirmed as mycoplasma negative by direct DNA staining with Hoescht 33342. |
| Commonly misidentified lines (See <a href="#">ICLAC</a> register) | No commonly misidentified cell lines were used.                                       |

## Animals and other organisms

---

Policy information about [studies involving animals](#); [ARRIVE guidelines](#) recommended for reporting animal research

|                         |                                                                                                                                                                                                                     |
|-------------------------|---------------------------------------------------------------------------------------------------------------------------------------------------------------------------------------------------------------------|
| Laboratory animals      | Five-week-old BALB/c male mice were purchased from Japan SLC Inc. (Shizuoka, Japan)                                                                                                                                 |
| Wild animals            | The study did not use wild animals.                                                                                                                                                                                 |
| Field-collected samples | The study did not involve samples collected from the field                                                                                                                                                          |
| Ethics oversight        | The animals were cared for according to the Animal Facility Guidelines of the University of Shizuoka. All animal experiments were approved by the Animal and Ethics Review Committee of the University of Shizuoka. |

Note that full information on the approval of the study protocol must also be provided in the manuscript.
